# Supplementary material for: Impacts and uncertainties of climate-induced changes in watershed inputs on estuarine hypoxia
Source: Copernicus journal article supplement (doi:10.5194/egusphere-2022-1028), 2022-10-20
Supplement: Supplementary file 1 [file egusphere-2022-1028-supplement.pdf]

## Supplementary Material

The supplementary material is comprised of three tables (Tables S1-S3) and four figures (Figures S1-S4). Appendix A provides additional details regarding the distribution of watershed organic nitrogen loadings to ChesROMS-ECB. Table S1 describes the USGS Site IDs for the three major rivers used to assess watershed model skill. Table S2 provides a list of locations for the Chesapeake Bay Program monitoring stations used to assess estuarine model skill. Table S3 lists the IDs, names, and KKZ ranks of all Earth System Models (ESMs) used in this study. Figure S1 compares regression metrics of watershed precipitation time periods used to predict annual hypoxic volume. Figure S2 shows the relative changes in watershed precipitation and temperatures for the five MACA and BCSD downscaled ESMs selected using the KKZ methodology. Figure S3 provides a representation of watershed model skill at the three major tributaries for discharge, nitrate, and organic nitrogen loadings. Figure S4 shows the relationship between Phase 6 MACA downscaled ESM estimates of annual hypoxic volume with and without the effects of management conditions.

**Table S1:** USGS Site IDs for major tributaries used to assess watershed model skill after applying WRTDS.

| <b>Major Tributary</b> | <b>USGS Site Name</b>                            | <b>USGS Site Number</b> |
|------------------------|--------------------------------------------------|-------------------------|
| Susquehanna            | SUSQUEHANNA RIVER AT CONOWINGO, MD               | 01578310                |
| Potomac                | POTOMAC RIVER AT CHAIN BRIDGE, AT WASHINGTON, DC | 01646580                |
| James                  | JAMES RIVER AT CARTERSVILLE, VA                  | 02035000                |

**Table S2:** Locations of 20 CBP stations used to assess estuarine model skill.

| <b>CBP Station ID</b> | <b>Latitude (° N)</b> | <b>Longitude (° W)</b> |
|-----------------------|-----------------------|------------------------|
| CB2.2                 | 39.3468               | -76.1747               |
| CB3.1                 | 39.2484               | -76.2380               |
| CB3.2                 | 39.1635               | -76.3063               |
| CB3.3C                | 38.9951               | -76.3597               |
| CB4.1C                | 38.8251               | -76.3997               |
| CB4.2C                | 38.6448               | -76.4177               |
| CB4.3C                | 38.5565               | -76.4347               |
| CB4.4                 | 38.4132               | -76.3430               |
| CB5.1                 | 38.3185               | -76.2930               |
| CB5.2                 | 38.1368               | -76.2280               |
| CB5.3                 | 37.9118               | -76.1680               |
| CB5.4                 | 37.8001               | -76.1747               |
| CB5.5                 | 37.6918               | -76.1897               |
| CB6.1                 | 37.5885               | -76.1622               |
| CB6.2                 | 37.4868               | -76.1563               |
| CB6.3                 | 37.4115               | -76.1597               |
| CB6.4                 | 37.2365               | -76.2080               |
| CB7.3                 | 37.1168               | -76.1252               |
| CB7.4                 | 36.9957               | -76.0205               |
| CB8.1                 | 36.9954               | -76.1677               |

**Table S3:** Full KKZ rankings for MACA and BCSD downscaled ESMs based on changes to May-October atmospheric temperatures and November-June precipitation. Bolded ESM names and ranks correspond to the first five that were selected by KKZ for MACA and/or BCSD.

| Model ID | ESM Name               | MACA Model Rank | BCSD Model Rank |
|----------|------------------------|-----------------|-----------------|
| M1       | bcc-csm1-1             | 16              | 18              |
| M2       | bcc-csm1-1-m           | 11              | 12              |
| M3       | BNU-ESM**              | 18              | --              |
| M4       | <b>CanESM2</b>         | <b>4</b>        | <b>5</b>        |
| M5       | CCSM4                  | 12              | 9               |
| M6       | CNRM-CM5               | 10              | 11              |
| M7       | CSIRO-Mk3-6-0          | 6               | 7               |
| M8       | GFDL-ESM2G             | 14              | 16              |
| M9       | GFDL-ESM2M             | 19              | 14              |
| M10      | <b>HadGEM2-CC365</b>   | <b>3</b>        | 8               |
| M11      | HadGEM2-ES365          | 7               | 6               |
| M12      | <b>inmcm4</b>          | <b>2</b>        | <b>2</b>        |
| M13      | <b>IPSL-CM5A-LR*</b>   | 20              | <b>1</b>        |
| M14      | IPSL-CM5A-MR           | 8               | 10              |
| M15      | <b>IPSL-CM5B-LR</b>    | <b>1</b>        | 15              |
| M16      | MIROC5                 | 17              | 13              |
| M17      | MIROC-ESM              | 13              | 19              |
| M18      | <b>MIROC-ESM-CHEM*</b> | 9               | <b>3</b>        |
| M19      | <b>MRI-CGCM3</b>       | <b>5</b>        | <b>4</b>        |
| M20      | NorESM1-M              | 15              | 17              |

\*The IPSL-CM5A-LR and MIROC-ESM-CHEM models downscaled with MACA were also applied to the Phase 6 watershed model to produce an exact match between ESMs when calculating the relative uncertainty contributions of different climate scenario factors.

\*\*The BNU-ESM model was available in the MACA dataset, but not in the BCSD dataset. Although the BNU-ESM model is not presented in Figure 2, it was still used in the KKZ selection process for MACA ESMs, but did not affect the first five selected.

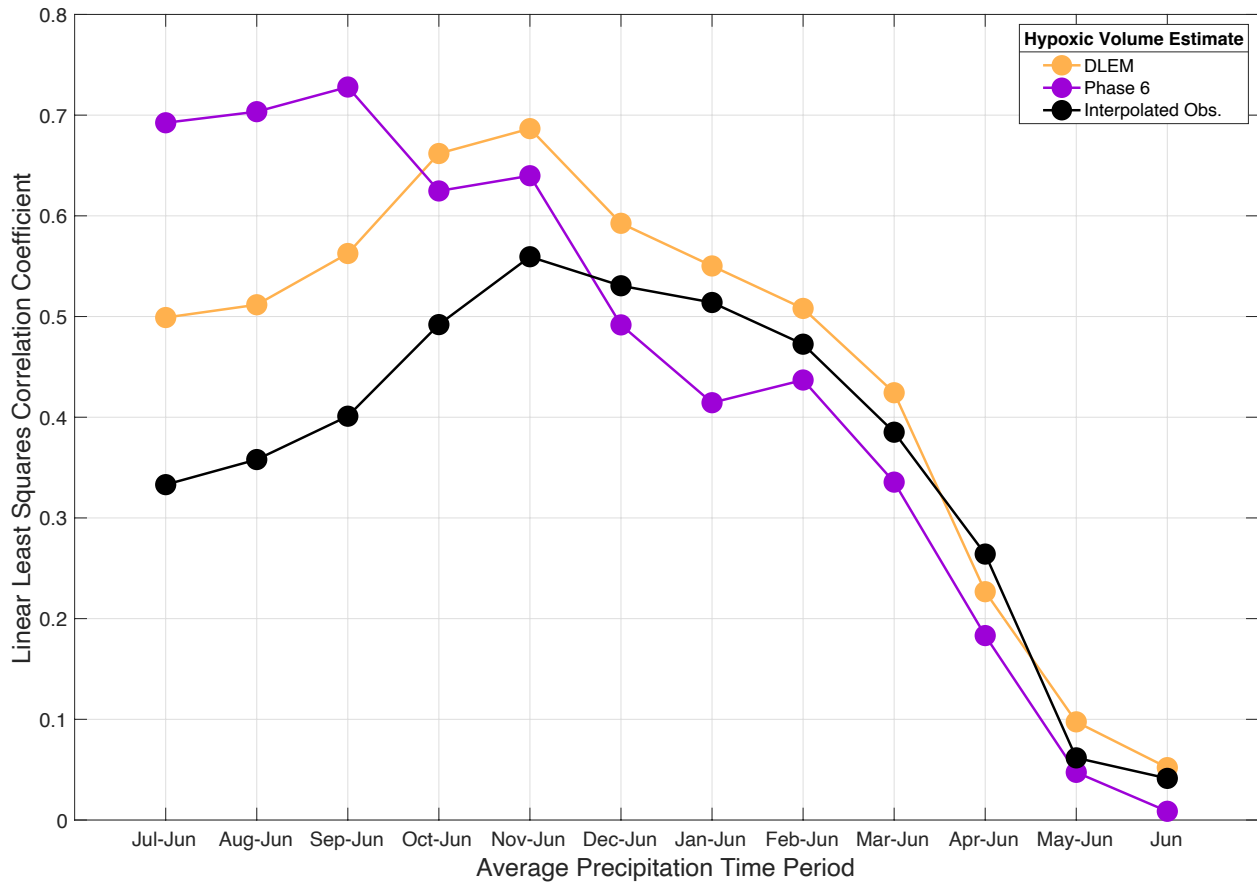

**Figure S1:** Correlation coefficients of annual hypoxic volume estimates (DLEM, Phase 6 and interpolated observations) as a function of average historical precipitation estimates for 1985-2014. The duration of average precipitation estimates decreases moving left to right, encompassing an entire year in the leftmost set of points and only accounting for June precipitation as a predictor of hypoxic volume in the rightmost set of points. The period November-June was chosen as the time period most predictive of AHV as it represents the highest correlations for both interpolated observations and DLEM hypoxia estimates, and has a comparable correlation for Phase 6 hypoxia.

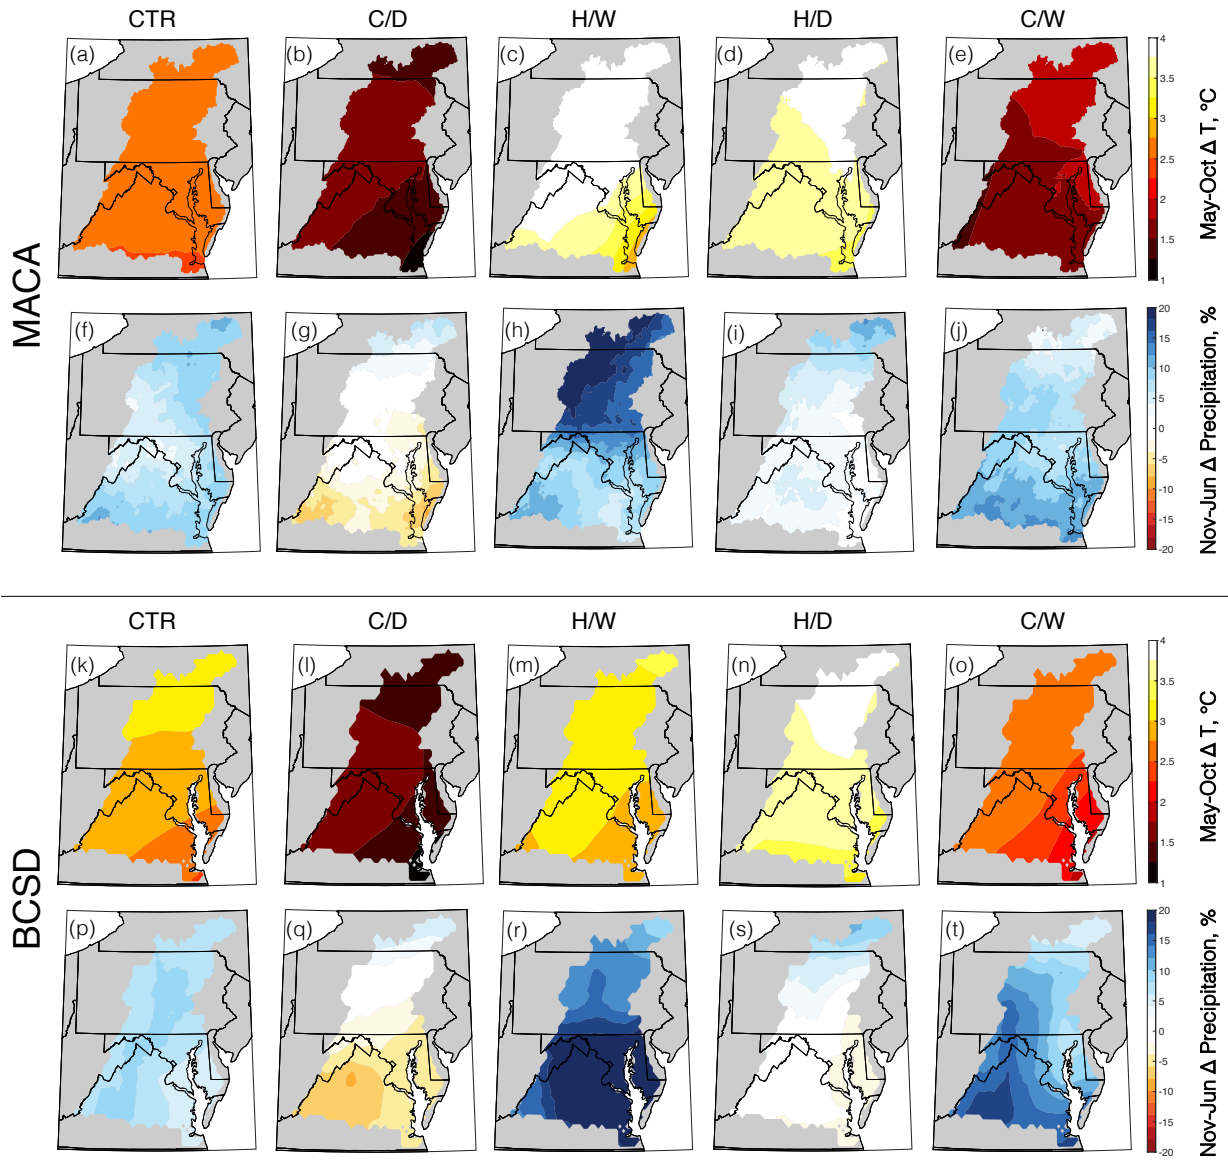

**Figure S2:** Relative changes in May to October temperatures (a-e, k-o) and November to June precipitation (f-j, p-t) for MACA (a-j) and BCSD (k-t) ESMs.

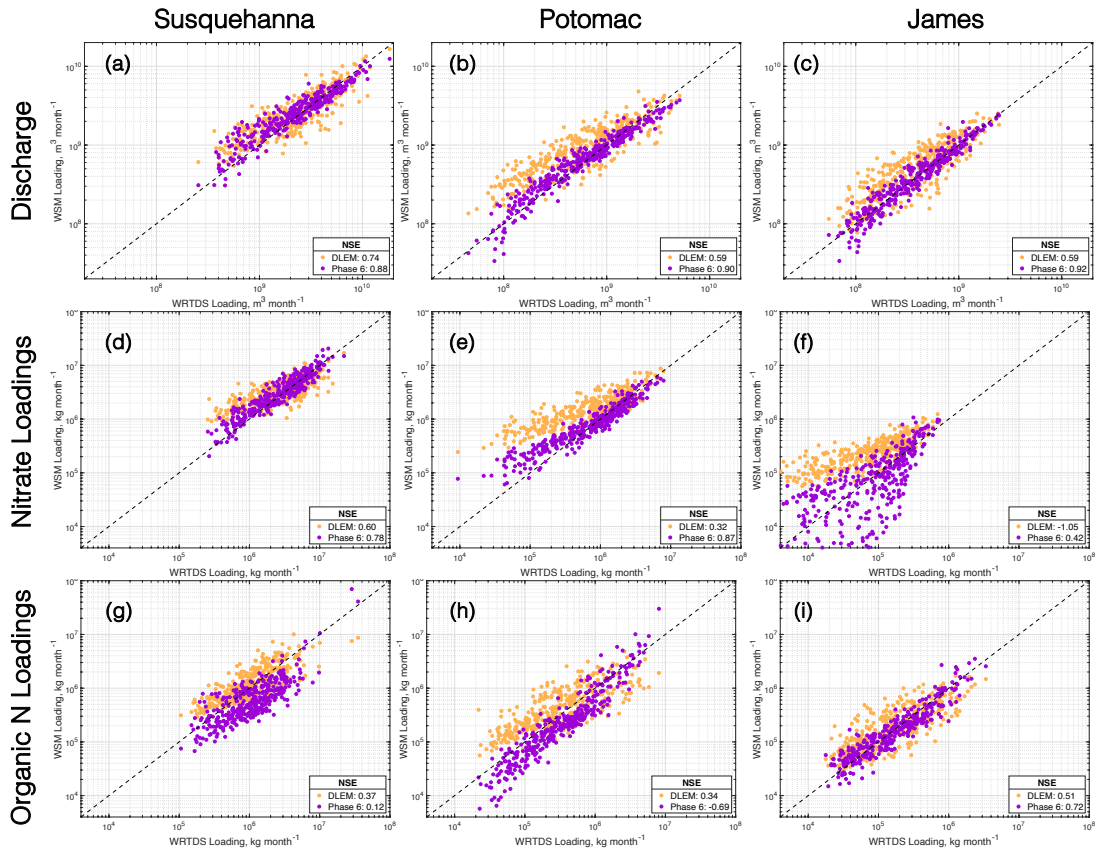

**Figure S3:** Comparison of monthly watershed model estimates vs. WRTDS derived observations for discharge (a-c), nitrate loadings (d-f) and organic nitrogen loadings (g-i) for the Susquehanna (a,d,g), Potomac (b,e,h), and James (c,f,i) tributaries at the respective river fall lines over the reference period 1991-2000. Nash–Sutcliffe Efficiencies (NSE) reported in bottom right of each panel for both watershed models.

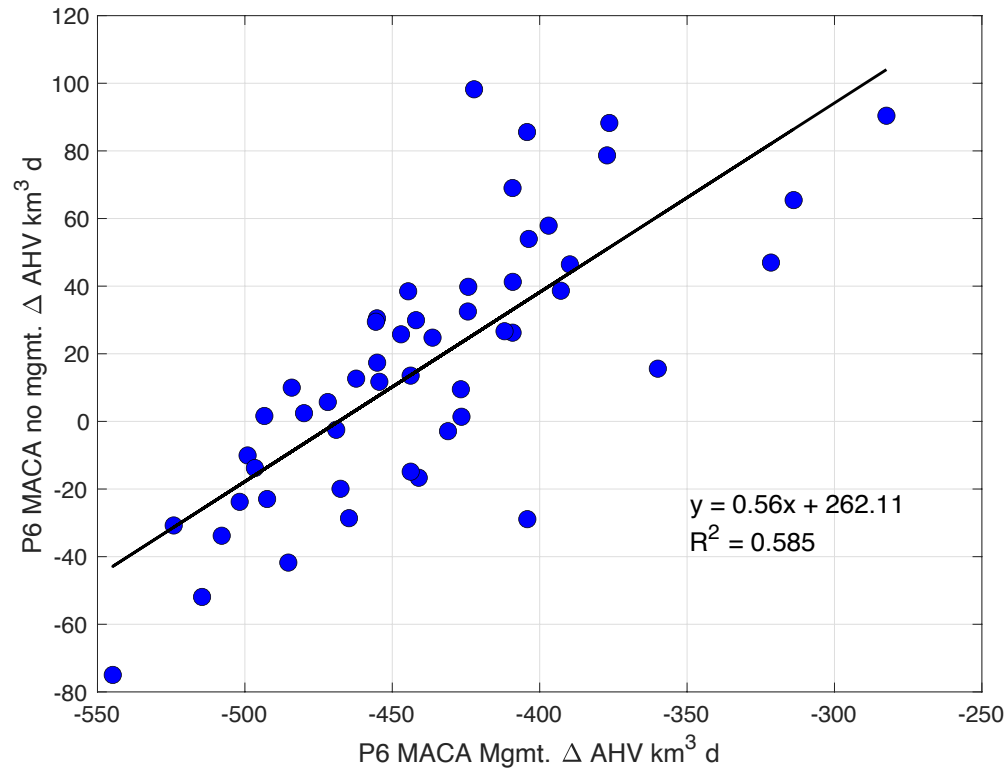

**Figure S4:** Relationship between MACA Phase 6 climate scenario  $\Delta$ AHV with and without the effects of management actions.
